# Supplementary material
Source: PubMed Central journal article supplement (PMC7098000)
Supplement: ao9b04358_si_001.pdf [file ao9b04358_si_001.pdf]

**Spin label scanning reveals likely locations of  $\beta$ -strands in the amyloid fibrils  
of the Ure2 prion domain**

Jingzhou Wang, Giovanna Park, Yoon Kyung Lee, Matthew Nguyen, Tiffany San Fung, Tiffany  
Yuwen Lin, Frederick Hsu, and Zhefeng Guo\*

Department of Neurology, Brain Research Institute, Molecular Biology Institute, University of  
California, Los Angeles, CA 90095, USA.

\*To whom correspondence should be addressed: Zhefeng Guo, Department of Neurology,  
University of California, Los Angeles, 710 Westwood Plaza, Los Angeles, CA 90095. Phone:  
(310) 439-9843; E-mail: zhefeng@ucla.edu

## Supplemental Table

**Table S1.** Values and fitting errors of Heisenberg exchange frequency ( $\omega$ ), rotational correlation time ( $\tau$ ) and order parameter ( $S$ ) from spectral simulations of spin-labeled Ure2p<sub>1-89</sub>-M fibrils.

| Residue | Component 1    |             |              | Component 2 |
|---------|----------------|-------------|--------------|-------------|
|         | $\omega$ (MHz) | $\tau$ (ns) | $S$          | $\tau$ (ns) |
| 2       | 58.7 ± 0.61    | 5.2 ± 0.1   | 0.6 ± 0.01   | 1.06 ± 0.03 |
| 3       | 85.7 ± 0.8     | 7.3 ± 0.1   | 0.5 ± 0.01   | 1.2 ± 0.05  |
| 4       | 71.7 ± 0.7     | 6.9 ± 0.1   | 0.5 ± 0.01   | 1.1 ± 0.04  |
| 5       | 45.8 ± 0.6     | 7.04 ± 0.1  | 0.4 ± 0.02   | 1.4 ± 0.08  |
| 6       | 86.2 ± 0.9     | 8.7 ± 0.1   | 0.4 ± 0.4    | 1.5 ± 0.06  |
| 7       | 65.8 ± 0.8     | 6.98 ± 0.1  | 0.5 ± 0.02   | 1.1 ± 0.03  |
| 8       | 136.9 ± 1.2    | 7.8 ± 0.1   | 0.4 ± 0.01   |             |
| 9       | 175.4 ± 1.1    | 6.6 ± 0.1   | 0.5 ± 0.01   |             |
| 10      | 122.8 ± 0.8    | 7.8 ± 0.1   | 0.1 ± 0.05   |             |
| 11      | 156.2 ± 0.95   | 6.03 ± 0.09 | 0.3 ± 0.01   |             |
| 12      | 97.9 ± 0.5     | 5.8 ± 0.07  | 0.4 ± 0.02   |             |
| 13      | 60.5 ± 0.4     | 6.7 ± 0.09  | 0.4 ± 0.02   |             |
| 14      | 85.8 ± 0.4     | 7.1 ± 0.06  | 0.2 ± 0.03   |             |
| 15      | 118.9 ± 0.7    | 6.7 ± 0.08  | 0.4 ± 0.02   |             |
| 16      | 144.5 ± 0.9    | 4.99 ± 0.08 | 0.6 ± 0.007  |             |
| 17      | 153.4 ± 0.9    | 5.5 ± 0.08  | 0.6 ± 0.004  |             |
| 18      | 151.05 ± 0.9   | 4.9 ± 0.07  | 0.6 ± 0.01   |             |
| 19      | 172.7 ± 1.1    | 6.1 ± 0.1   | 0.5 ± 0.007  |             |
| 20      | 157.5 ± 1.2    | 6.3 ± 0.1   | 0.5 ± 0.01   |             |
| 21      | 183.6 ± 1.02   | 4.7 ± 0.07  | 0.6 ± 0.004  |             |
| 22      | 125.5 ± 0.7    | 3.5 ± 0.06  | 0.6 ± 0.008  |             |
| 23      | 119.9 ± 0.7    | 3.2 ± 0.07  | 0.6 ± 0.007  |             |
| 24      | 195.8 ± 1.02   | 4.3 ± 0.06  | 0.6 ± 0.004  |             |
| 25      | 196.7 ± 1.8    | 5.9 ± 0.2   | 0.6 ± 0.008  |             |
| 26      | 159.98 ± 0.8   | 4.7 ± 0.06  | 0.5 ± 0.006  |             |
| 27      | 213.03 ± 1.8   | 6.9 ± 0.2   | 0.6 ± 0.005  |             |
| 28      | 208.4 ± 1.6    | 7.9 ± 0.2   | 0.5 ± 0.006  |             |
| 29      | 176.9 ± 1.01   | 5.9 ± 0.08  | 0.4 ± 0.009  |             |
| 30      | 224.2 ± 1.9    | 8.7 ± 0.2   | 0.5 ± 0.007  |             |
| 31      | 155.96 ± 0.9   | 5.5 ± 0.09  | 0.5 ± 0.007  |             |
| 32      | 124.9 ± 0.6    | 6.9 ± 0.08  | 0.5 ± 0.009  |             |
| 33      | 196.8 ± 1.4    | 8.8 ± 0.1   | 0.2 ± 0.02   |             |
| 34      | 160.2 ± 0.8    | 8.8 ± 0.1   | 0.0          |             |
| 35      | 191.5 ± 1.1    | 6.8 ± 0.1   | 0.53 ± 0.005 |             |
| 36      | 124.98 ± 0.8   | 6.06 ± 0.09 | 0.3 ± 0.02   |             |
| 37      | 151.9 ± 0.8    | 6.1 ± 0.08  | 0.4 ± 0.008  |             |
| 38      | 158.99 ± 0.9   | 5.4 ± 0.08  | 0.5 ± 0.007  |             |
| 39      | 114.7 ± 0.5    | 7.1 ± 0.07  | 0.3 ± 0.01   |             |
| 40      | 159.06 ± 0.9   | 5.3 ± 0.08  | 0.5 ± 0.007  |             |
| 41      | 149.6 ± 0.8    | 6.8 ± 0.1   | 0.5 ± 0.007  |             |

|    |              |             |             |             |
|----|--------------|-------------|-------------|-------------|
| 42 | 43.3 ± 0.9   | 4.4 ± 0.1   | 0.4 ± 0.02  |             |
| 43 | 99.96 ± 0.7  | 5.9 ± 0.07  | 0.2 ± 0.02  |             |
| 44 | 135.7 ± 0.6  | 5.06 ± 0.06 | 0.5 ± 0.006 |             |
| 45 | 201.9 ± 1.4  | 4.97 ± 0.1  | 0.6 ± 0.006 |             |
| 46 | 159.1 ± 0.9  | 5.5 ± 0.09  | 0.6 ± 0.006 |             |
| 47 | 93.1 ± 0.4   | 4.8 ± 0.07  | 0.5 ± 0.01  |             |
| 48 | 165.3 ± 0.8  | 5.6 ± 0.07  | 0.5 ± 0.007 |             |
| 49 | 149.1 ± 0.5  | 4.7 ± 0.06  | 0.5 ± 0.007 |             |
| 50 | 144.9 ± 1.4  | 7.5 ± 0.2   | 0.5 ± 0.01  |             |
| 51 | 132.8 ± 0.7  | 4.9 ± 0.07  | 0.5 ± 0.008 |             |
| 52 | 134.6 ± 0.7  | 3.97 ± 0.05 | 0.4 ± 0.001 |             |
| 53 | 130.95 ± 0.6 | 6.2 ± 0.07  | 0.5 ± 0.008 |             |
| 54 | 146.9 ± 0.9  | 5.3 ± 0.08  | 0.5 ± 0.008 |             |
| 55 | 136.8 ± 0.8  | 4.6 ± 0.07  | 0.4 ± 0.01  |             |
| 56 | 149.5 ± 0.8  | 4.7 ± 0.06  | 0.5 ± 0.008 |             |
| 57 | 157.1 ± 0.8  | 5.3 ± 0.07  | 0.5 ± 0.006 |             |
| 58 | 140.9 ± 0.8  | 4.4 ± 0.06  | 0.4 ± 0.01  |             |
| 59 | 121.4 ± 0.7  | 4.2 ± 0.06  | 0.5 ± 0.001 |             |
| 60 | 143.8 ± 0.8  | 5.1 ± 0.06  | 0.4 ± 0.009 |             |
| 61 | 125.7 ± 0.7  | 3.8 ± 0.06  | 0.5 ± 0.008 |             |
| 62 | 148.9 ± 3.5  | 5.2 ± 0.1   | 0.4 ± 0.08  |             |
| 63 | 160.6 ± 0.9  | 5.4 ± 0.08  | 0.5 ± 0.007 |             |
| 64 | 131.6 ± 0.8  | 4.3 ± 0.07  | 0.5 ± 0.01  |             |
| 65 | 151.7 ± 0.9  | 7.7 ± 0.1   | 0.4 ± 0.01  |             |
| 66 | 137.9 ± 1.9  | 6.02 ± 0.1  | 0.5 ± 0.01  | 1.2 ± 0.05  |
| 67 | 185.3 ± 2.3  | 9.9 ± 0.3   | 0.6 ± 0.005 | 1.6 ± 0.03  |
| 68 | 151.4 ± 2.3  | 6.9 ± 0.2   | 0.5 ± 0.008 | 1.4 ± 0.04  |
| 69 | 70.7 ± 1.1   | 2.9 ± 0.07  | 0.4 ± 0.02  | 0.7 ± 0.05  |
| 70 | 145.2 ± 2.03 | 13.7 ± 0.5  | 0.04 ± 0.01 | 1.5 ± 0.03  |
| 71 | 129.2 ± 2.5  | 6.4 ± 0.1   | 0.5 ± 0.01  | 1.7 ± 0.05  |
| 72 | 151.9 ± 1.9  | 9.5 ± 0.2   | 0.1 ± 0.04  | 0.6 ± 0.04  |
| 73 | 75.2 ± 0.8   | 6.9 ± 0.1   | 0.6 ± 0.001 | 1.5 ± 0.03  |
| 74 | 149.5 ± 2.2  | 13.3 ± 0.4  | 0.2 ± 0.03  | 1.8 ± 0.06  |
| 75 | 173.6 ± 1.8  | 13.0 ± 0.4  | 0.5 ± 0.01  | 0.9 ± 0.06  |
| 76 | 140.3 ± 2.1  | 7.3 ± 0.2   | 0.6 ± 0.01  | 1.5 ± 0.03  |
| 77 | 38.3 ± 1.2   | 5.3 ± 0.3   | 0.7 ± 0.02  | 1.6 ± 0.02  |
| 78 | 127.3 ± 2.3  | 8.9 ± 0.3   | 0.5 ± 0.02  | 1.6 ± 0.05  |
| 79 | 71.8 ± 1.4   | 7.9 ± 0.2   | 0.4 ± 0.02  | 1.5 ± 0.04  |
| 80 | 123.9 ± 2.04 | 9.1 ± 0.2   | 0.5 ± 0.01  | 1.98 ± 0.08 |

---
